# Supplementary material for: Age-associated DNA methylation changes in immune genes, histone modifiers and chromatin remodeling factors within 5 years after birth in human blood leukocytes
Source: PubMed Central journal article supplement (PMC4396570; doi:10.1186/s13148-015-0064-6), 2015-03-26

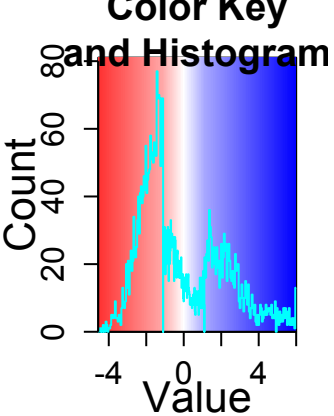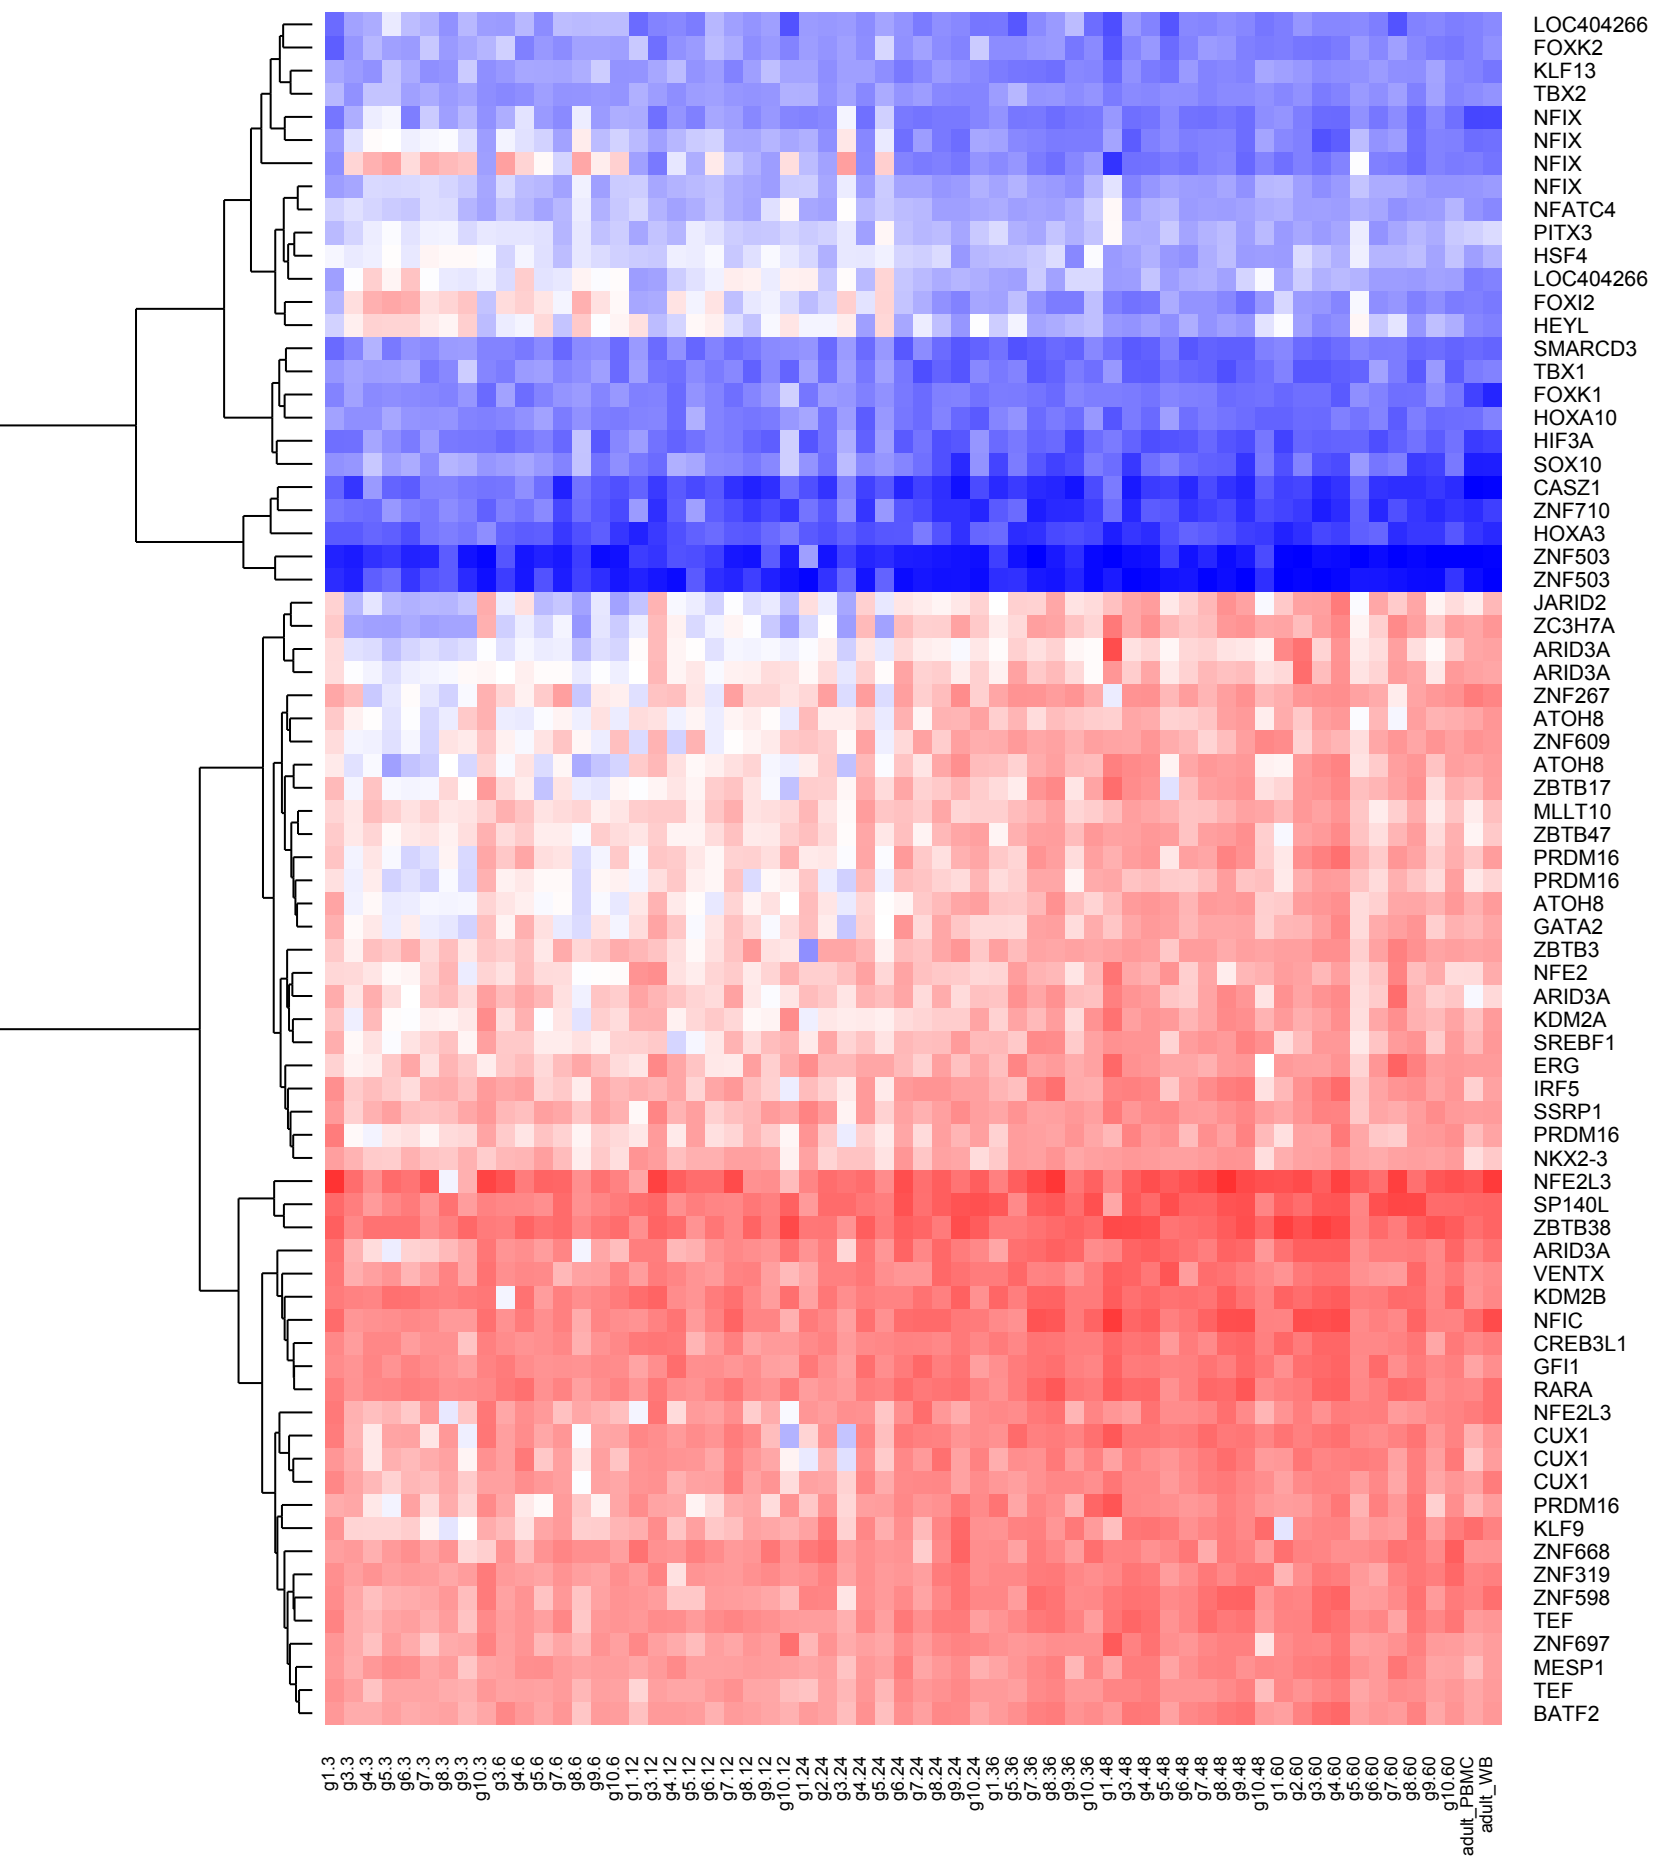

Supplement: 13148_2015_64_MOESM7_ESM.pdf [file 13148_2015_64_MOESM7_ESM.pdf]
